# Supplementary material for: Multi-Site Observational Study to Assess Biomarkers for Susceptibility or Resilience to Chronic Pain: The Acute to Chronic Pain Signatures (A2CPS) Study Protocol
Source: PubMed Central journal article supplement (PMC9082267; doi:10.3389/fmed.2022.849214), 2022-04-25
Supplement: Data_Sheet_1.pdf [file Data_Sheet_1.pdf]

## *Supplementary Material*

**Supplementary Table 1. A2CPS Consortium Sites & Roles.** Each consortium site consists of institutions with designated roles to fulfill A2CPS objectives.

| A2CPS Consortium Site                              | Institutions                                                                                                                                                                                                                                                                                                                                                                                                                                                                                        | Role                                                                                                                                                                                                                                                              |
|----------------------------------------------------|-----------------------------------------------------------------------------------------------------------------------------------------------------------------------------------------------------------------------------------------------------------------------------------------------------------------------------------------------------------------------------------------------------------------------------------------------------------------------------------------------------|-------------------------------------------------------------------------------------------------------------------------------------------------------------------------------------------------------------------------------------------------------------------|
| <b>Clinical Coordinating Center (CCC)</b>          | <ul style="list-style-type: none"> <li>University of Iowa</li> </ul>                                                                                                                                                                                                                                                                                                                                                                                                                                | Serve as the hub for MCCs. The CCC will support study design, efficiency, progress, and quality, will coordinate/monitor study implementation across the clinical sites, and will lead the consortium in developing and implementing protocols and standards      |
| <b>Data Integration and Research Center (DIRC)</b> | <ul style="list-style-type: none"> <li>Johns Hopkins University</li> <li>Dartmouth University</li> <li>Texas Advanced Computing Center</li> </ul>                                                                                                                                                                                                                                                                                                                                                   | Integrate the efforts of all funded components of the A2CPS and serve as a community-wide nexus for protocols, data, assay and data standards, and other resources generated by the A2CPS Program                                                                 |
| <b>Omics Data Generation Centers (ODGCs)</b>       | <ul style="list-style-type: none"> <li>University of California, San Diego</li> <li>Wake Forest University</li> <li>Pacific Northwest National Laboratory</li> <li>West Coast Metabolomics Center at University of California, Davis</li> <li>University of Pittsburgh</li> </ul>                                                                                                                                                                                                                   | Use cutting edge technologies to perform omics analyses (e.g., metabolomic, lipidomic, proteomic, genetics, extracellular RNA) of body fluids collected by the Acute to Chronic Pain Signatures (A2CPS) Consortium                                                |
| <b>Multisite Clinical Centers (MCCs)</b>           | <p><u>MCC1:</u></p> <ul style="list-style-type: none"> <li>Rush University Medical Center</li> <li>University of Chicago</li> <li>University of Illinois at Chicago</li> <li>NorthShore University Health System</li> </ul> <p><u>MCC2:</u></p> <ul style="list-style-type: none"> <li>University of Michigan</li> <li>Wayne State University</li> <li>Spectrum Health*</li> <li>St. Joseph Mercy Health System (Ann Arbor)</li> <li>Henry Ford Health System (Detroit, Macomb, Jackson)</li> </ul> | Implement the enrollment and multimodal longitudinal assessment of a large cohort of acute peri-operative pain patients (total knee arthroplasty and thoracic surgery) to identify a biosignature for resilience to and the transition from acute to chronic pain |

\*Not fully activated as of February 2022

**Supplementary Table 2. Secondary Biomarkers and Assessments.** List of identified secondary biomarkers and designated assessments.

| <u>Secondary Biomarkers</u>                         | <u>Assessment</u>                                                                                                                  |
|-----------------------------------------------------|------------------------------------------------------------------------------------------------------------------------------------|
| <b>Subject Characteristics</b>                      |                                                                                                                                    |
| 1. Age                                              | Demographics questionnaire                                                                                                         |
| 2. Sex/gender                                       | Demographics questionnaire                                                                                                         |
| 3. Ethnicity/race                                   | Demographics questionnaire                                                                                                         |
| 4. Education                                        | Demographics questionnaire                                                                                                         |
| 5. Relationship status                              | Demographics questionnaire                                                                                                         |
| 6. Income                                           | Demographics questionnaire                                                                                                         |
| 7. Disability insurance                             | Demographics questionnaire                                                                                                         |
| 8. Co-morbidities                                   | Self-Administered Comorbidities Questionnaire                                                                                      |
| 9. Opioid use                                       | Opioid use items                                                                                                                   |
| 10. Opioid likeability                              | Opioid likeability and side-effect items                                                                                           |
| 11. Opioid or other substance misuse                | Tobacco, Alcohol, Prescription medication, and other Substance use (TAPS)<br>Current Opioid Misuse Measure (COMM)                  |
| 12. Other pharmacologic treatments                  | Other treatments questionnaire                                                                                                     |
| 13. Other non-pharmacologic treatments              | Other treatments questionnaire                                                                                                     |
| 14. Smoking                                         | TAPS + smoking duration and packs per day                                                                                          |
| 15. Surgery and hospital stay details               | Electronic health record data                                                                                                      |
| <b>Patient Reported Outcomes &amp; Behavior</b>     |                                                                                                                                    |
| 16. Pain duration                                   | Demographics questionnaire                                                                                                         |
| 17. Pain impact/quality of life (surgery specific)  | Knee Injury and Osteoarthritis Outcome Score – 12<br>Danish Thoracic Surgery Questionnaire                                         |
| 18. Trajectory assessments                          | Single item daily assessments of sleep, physical activity, medication, sadness, anger, and nervousness during post-surgical period |
| 19. Pain interference                               | Brief Pain Inventory – Interference scale<br>Acute trajectory following surgery                                                    |
| 20. Physical activity level                         | Rapid Assessment of Physical Activity                                                                                              |
| 21. Personality – neuroticism                       | Big Five Inventory–2 short form                                                                                                    |
| 22. Personality – agreeableness                     | Big Five Inventory–2 short form                                                                                                    |
| 23. Personality – conscientiousness                 | Big Five Inventory–2 short form                                                                                                    |
| 24. Personality – openness                          | Big Five Inventory–2 short form                                                                                                    |
| 25. Personality – extraversion                      | Big Five Inventory–2 short form                                                                                                    |
| 26. Multisensory sensitivity                        | General Sensory Sensitivity – 8                                                                                                    |
| 27. Expectation                                     | Single item questions, 0-10 NRS                                                                                                    |
| 28. Global impression of change                     | Patient’s Global Impression of Change (PGIC)                                                                                       |
| 29. Fatigue                                         | PROMIS Short Form v1.0 – Fatigue 7a                                                                                                |
| 30. Neuropathic pain symptoms                       | PainDETECT                                                                                                                         |
| 31. Acute pain                                      | EHR data, acute Michigan Body Map                                                                                                  |
| <b>Omics</b>                                        |                                                                                                                                    |
| 32. Interferon-gamma                                | Proteomics/Luminex                                                                                                                 |
| 33. Interleukin-17                                  | Proteomics/Luminex                                                                                                                 |
| 34. Interleukin-1beta                               | Proteomics/Luminex                                                                                                                 |
| 35. Heparin-binding epidermal growth factor         | Proteomics/Luminex                                                                                                                 |
| 36. Monocyte chemoattractant protein-1 (MCP-1/CCL2) | Proteomics/Luminex                                                                                                                 |

|                                                                                                                   |                                                       |
|-------------------------------------------------------------------------------------------------------------------|-------------------------------------------------------|
| 37. Cyclooxygenase-2                                                                                              | Proteomics/Luminex                                    |
| 38. Interleukin-4                                                                                                 | Proteomics/Luminex                                    |
| 39. Interleukin-5                                                                                                 | Proteomics/Luminex                                    |
| 40. Interleukin-10                                                                                                | Proteomics/Luminex                                    |
| 41. Interleukin-13                                                                                                | Proteomics/Luminex                                    |
| 42. Brain derived neurotrophic factor                                                                             | Proteomics/Luminex                                    |
| 43. Nerve growth factor                                                                                           | Proteomics/Luminex                                    |
| 44. Leptin                                                                                                        | Proteomics/Luminex                                    |
| 45. Adiponectin                                                                                                   | Proteomics/Luminex                                    |
| 46. miR-223-3p                                                                                                    | exRNA                                                 |
| 47. Interleukin-6 (rs2069845)                                                                                     | SNP Array                                             |
| 48. Interleukin-13 (rs1295686)                                                                                    | SNP Array                                             |
| 49. Tumor necrosis factor-alpha (rs1800610)                                                                       | SNP Array                                             |
| 50. Serotonergic signaling pathway (rs9316233, rs4776783, rs12439516, rs2276008, rs6928, rs3813928)               | SNP Array                                             |
| 51. T-cell receptor pathway (rs10500205, rs216535, rs306083, rs3797739, rs2070995, rs3756612, rs815815, rs790250) | SNP Array                                             |
| 52. Voltage-gated K channel subunit KV9.1 (rs734784)                                                              | SNP Array                                             |
| 53. Nuclear receptor subfamily-3 group-C member 1 (rs2963155)                                                     | SNP Array                                             |
| 54. GTP cyclohydrolase 1 (rs998259)                                                                               | SNP Array                                             |
| 55. Palmitoylethanolamide (NAE 16:0)                                                                              | Lipidomics                                            |
| 56. 2-Arachidonoylglycerol                                                                                        | Lipidomics                                            |
| 57. Sphingomyelin (d18:1/16:0)                                                                                    | Lipidomics                                            |
| 58. Ceramide (d18:1/16:0)                                                                                         | Lipidomics                                            |
| 59. Phosphoinositol (18:0/20:4)                                                                                   | Lipidomics                                            |
| 60. Threonic acid                                                                                                 | Metabolomics                                          |
| 61. Nonanoic acid                                                                                                 | Metabolomics                                          |
| 62. Hypoxanthine                                                                                                  | Metabolomics                                          |
| 63. Inosine                                                                                                       | Metabolomics                                          |
| 64. Kynurenic acid                                                                                                | Metabolomics                                          |
| <b>Quantitative Sensory Testing</b>                                                                               |                                                       |
| 65. Pressure pain threshold                                                                                       | Pressure algometer at shoulder                        |
| 66. Temporal summation                                                                                            | Punctate stimulus Neuropen at shoulder                |
| 67. Cuff pain sensitivity                                                                                         | Pressure cuff and pain rating                         |
| <b>Brain Imaging</b>                                                                                              |                                                       |
| 68. Gray matter density                                                                                           | T1                                                    |
| 69. Gray matter morphometry                                                                                       | T1 gray matter                                        |
| 70. Gray matter volume of hippocampus                                                                             | T1                                                    |
| 71. Gray matter volume of amygdala                                                                                | T1                                                    |
| 72. Node degree Hipp, R dlPFC                                                                                     | rsfMRI                                                |
| 73. Lateral thalamus - PAG connectivity                                                                           | rsfMRI                                                |
| 74. FA in superior longitudinal fasciculus (fronto-parietal), internal and external capsule                       | Diffusion weighted imaging, white matter tractography |
| 75. Local pattern responses in nociceptive regions                                                                | Task fMRI (pressure cuff)                             |
| 76. Context-related local pattern responses                                                                       | Task fMRI (pressure cuff)                             |
| 77. Response to pain offset in reward systems                                                                     | Task fMRI (pressure cuff)                             |



|                                |                                                   | Consent | Baseline surveys** | Baseline Clinic Visit | 3d pre-op** | Acute phase**         | 6-wks post-op ** surveys | 6-wks post-op clinic visit | 3-mo post-op ** surveys | 3-mo post-op clinic visit | 6-mo post-op ** surveys | 12-mo post-op ** surveys |
|--------------------------------|---------------------------------------------------|---------|--------------------|-----------------------|-------------|-----------------------|--------------------------|----------------------------|-------------------------|---------------------------|-------------------------|--------------------------|
| <b>Procedures</b>              |                                                   |         |                    |                       |             |                       |                          |                            |                         |                           |                         |                          |
| <b>Other:</b>                  | <b>Depression (PHQ-8)</b>                         |         | X                  |                       |             |                       | X                        |                            | X                       |                           | X                       |                          |
|                                | <b>Anxiety (GAD-7)</b>                            |         | X                  |                       |             |                       | X                        |                            | X                       |                           | X                       |                          |
|                                | <b>Social &amp; Instrumental Support-(PROMIS)</b> |         | X                  |                       |             |                       | X                        |                            | X                       |                           |                         |                          |
|                                | <b>Expectation-3</b>                              |         |                    |                       | X           |                       |                          |                            |                         |                           |                         |                          |
|                                | <b>Trauma Hx (ACE)</b>                            |         | X                  |                       |             |                       |                          |                            |                         |                           |                         |                          |
|                                | <b>Personality (BF-S-2)</b>                       |         | X                  |                       |             |                       |                          |                            |                         |                           |                         |                          |
|                                | <b>Cognitive Dysfunction (MISCI)</b>              |         | X                  |                       |             |                       | X                        |                            | X                       |                           | X                       |                          |
|                                | <b>Fatigue (PROMIS)</b>                           |         | X                  |                       |             |                       | X                        |                            | X                       |                           | X                       |                          |
| <b>Trajectory survey items</b> |                                                   |         |                    |                       |             | X<br>d3-25            |                          |                            |                         |                           | X<br>x7d                | X<br>1d                  |
| <b>“Omics”:</b>                | <b>Blood draw</b>                                 |         |                    | X                     |             |                       |                          |                            |                         | X                         |                         |                          |
|                                | <b>Meal, caffeine, meds survey</b>                |         |                    | X                     |             |                       |                          | X                          |                         | X                         |                         |                          |
| <b>Function Tests:</b>         | <b>5TSTS, 10m walk</b>                            |         |                    | X#                    |             |                       |                          |                            |                         | X#                        |                         |                          |
|                                | <b>Coughing/deep breathing</b>                    |         |                    | X+                    |             | X+<br>d7,14,<br>21,28 | X+                       |                            | X+                      | X+                        | X+                      |                          |
| <b>QST:</b>                    | <b>PPTs</b>                                       |         |                    | X                     |             |                       |                          |                            |                         | X                         |                         |                          |
|                                | <b>TS</b>                                         |         |                    | X                     |             |                       |                          |                            |                         | X                         |                         |                          |
|                                | <b>CPM</b>                                        |         |                    | X                     |             |                       |                          |                            |                         | X                         |                         |                          |
|                                | <b>Allodynia</b>                                  |         |                    | X+                    |             |                       |                          |                            |                         | X+                        |                         |                          |
| <b>MRI</b>                     | <b>survey: pain, mood</b>                         |         |                    | X                     |             |                       |                          |                            |                         | X                         |                         |                          |
|                                | <b>T1, DWI</b>                                    |         |                    | X                     |             |                       |                          |                            |                         | X                         |                         |                          |
|                                | <b>fMRI: Rest /cuff x2 /rest</b>                  |         |                    | X                     |             |                       |                          |                            |                         | X                         |                         |                          |
|                                | <b>Visit satisfaction assessment</b>              |         |                    | X                     |             |                       |                          |                            |                         |                           |                         |                          |

Acute phase = days 3 to 28 post-op, \*\*= remote assessment, # = knee arthroplasty cohort only, + = thoracic surgery cohort, q = every, d = days

## *Supplementary Material*

**Supplementary Table 4. Data Completion Rates by Biomarker Domain.** Completion rates represented by number completed to number expected as of January 2022.

| Biomarker                    | Knee Arthroplasty |           |          | Thoracic Surgery |          |          |
|------------------------------|-------------------|-----------|----------|------------------|----------|----------|
|                              | Baseline          | 3 Months  | 6 Months | Baseline         | 3 Months | 6 Months |
| Surveys                      | 233 / 237         | 142 / 154 | 61 / 61  | 50 / 50          | 22 / 22  | 2 / 2    |
| Functional Assessments       | 222 / 235         | 95 / 148  | N/A      | 50 / 50          | 18 / 21  | N/A      |
| Quantitative Sensory Testing | 224 / 235         | 94 / 148  | N/A      | 49 / 50          | 18 / 21  | N/A      |
| Imaging                      | 180 / 235         | 71 / 90   | N/A      | 40 / 50          | 11 / 21  | N/A      |
| Biospecimen Sample           | 220 / 235         | 91 / 148  | N/A      | 48 / 50          | 18 / 21  | N/A      |
